# Supplementary material for: Thermal and non-thermal processing of red-fleshed apple: how are (poly)phenol composition and bioavailability affected?
Source: Royal Society of Chemistry journal article supplement (doi:10.1039/d0fo02631j), 2020-01-01
Supplement: d0fo02631j1.pdf [file d0fo02631j1.pdf]

**Thermal and non-thermal processing of red-fleshed apple: how are (poly)phenol  
composition and bioavailability affected?**

Silvia Yuste<sup>1</sup>, Alba Macià<sup>1</sup>, María-José Motilva<sup>1,‡</sup>, Neus Prieto-Diez<sup>1</sup>, María-Paz  
Romero<sup>1</sup>, Anna Pedret<sup>2</sup>, Rosa Solà<sup>2</sup>, Iziar A. Ludwig<sup>1,2,¥,\*</sup>, Laura Rubió<sup>1,\*</sup>

<sup>1</sup> Food Technology Department, Agrotecnio Research Center, University of Lleida,  
Av/Alcalde Rovira Roure 191, 25198 Lleida, Spain.

<sup>2</sup> Functional Nutrition, Oxidation, and CVD Research Group, Facultat de Medicina i  
Ciències de la Salut, University Rovira i Virgili, Carrer de Sant Llorenç 21, 43201  
Reus, Tarragona, Spain.

‡ Present address: Instituto de Ciencias de la Vid y del Vino (ICVV), CSIC-Universidad  
de La Rioja-Gobierno de La Rioja, Finca “La Grajera”, Carretera de Burgos km 6,  
26007 Logroño, Spain.

¥ Present address: Medicinal Chemistry Laboratory, Center for Applied Medical  
Research (Cima), University of Navarra, Av/Pio II, 55, 31008 Pamplona, Spain.

\*Corresponding authors:

E-mail: [iludwig@tecal.udl.cat](mailto:iludwig@tecal.udl.cat)

Tel. +34 973 702314

E-mail: [laura.rubio@udl.cat](mailto:laura.rubio@udl.cat)

Tel. +34 973 702554

## **Supplementary Figure Captions**

**Supplemental Figure 1.** Benzoic, phenylpropionic, phenylvalerolactones, catechol and hydroxycinnamic derivatives excretion kinetics (in  $\mu\text{mol/h}$ ) in urine for each product derived from red-fleshed apple. Data expressed as mean values  $\pm$  SD of the sum of phase II methyl-, sulphate-, and glucuronide metabolites detected in urine 0-24 h post ingestion. Data of single compounds excretion kinetics are shown in Supplemental Table 4.

**Supplemental Figure 2.** Anthocyanins (in  $\text{nmol/h}$ ), dihydrochalcones (in  $\mu\text{mol/h}$ ) and flavan-3-ols derivatives (in  $\mu\text{mol/h}$ ) excretion kinetics in urine for each product derived from red-fleshed apple. Data expressed as mean values  $\pm$  SD of the sum of glycosides and phase II methyl-, sulphate-, and glucuronide metabolites detected in urine 0-24 h post ingestion. Data of single compounds excretion kinetics are shown in Supplemental Table 4.

**Supplemental Figure 3.** Schematic representation (% of each group over the total) of the main phenolic groups excreted in urine of each volunteer after the intake of freeze-dried red-fleshed apple, hot air-dried red-fleshed apple and red-fleshed apple pasteurized purée.
