# Supplementary material for: Thermal and non-thermal processing of red-fleshed apple: how are (poly)phenol composition and bioavailability affected?
Source: Royal Society of Chemistry journal article supplement (doi:10.1039/d0fo02631j), 2020-01-01
Supplement: d0fo02631j2.pdf [file d0fo02631j2.pdf]

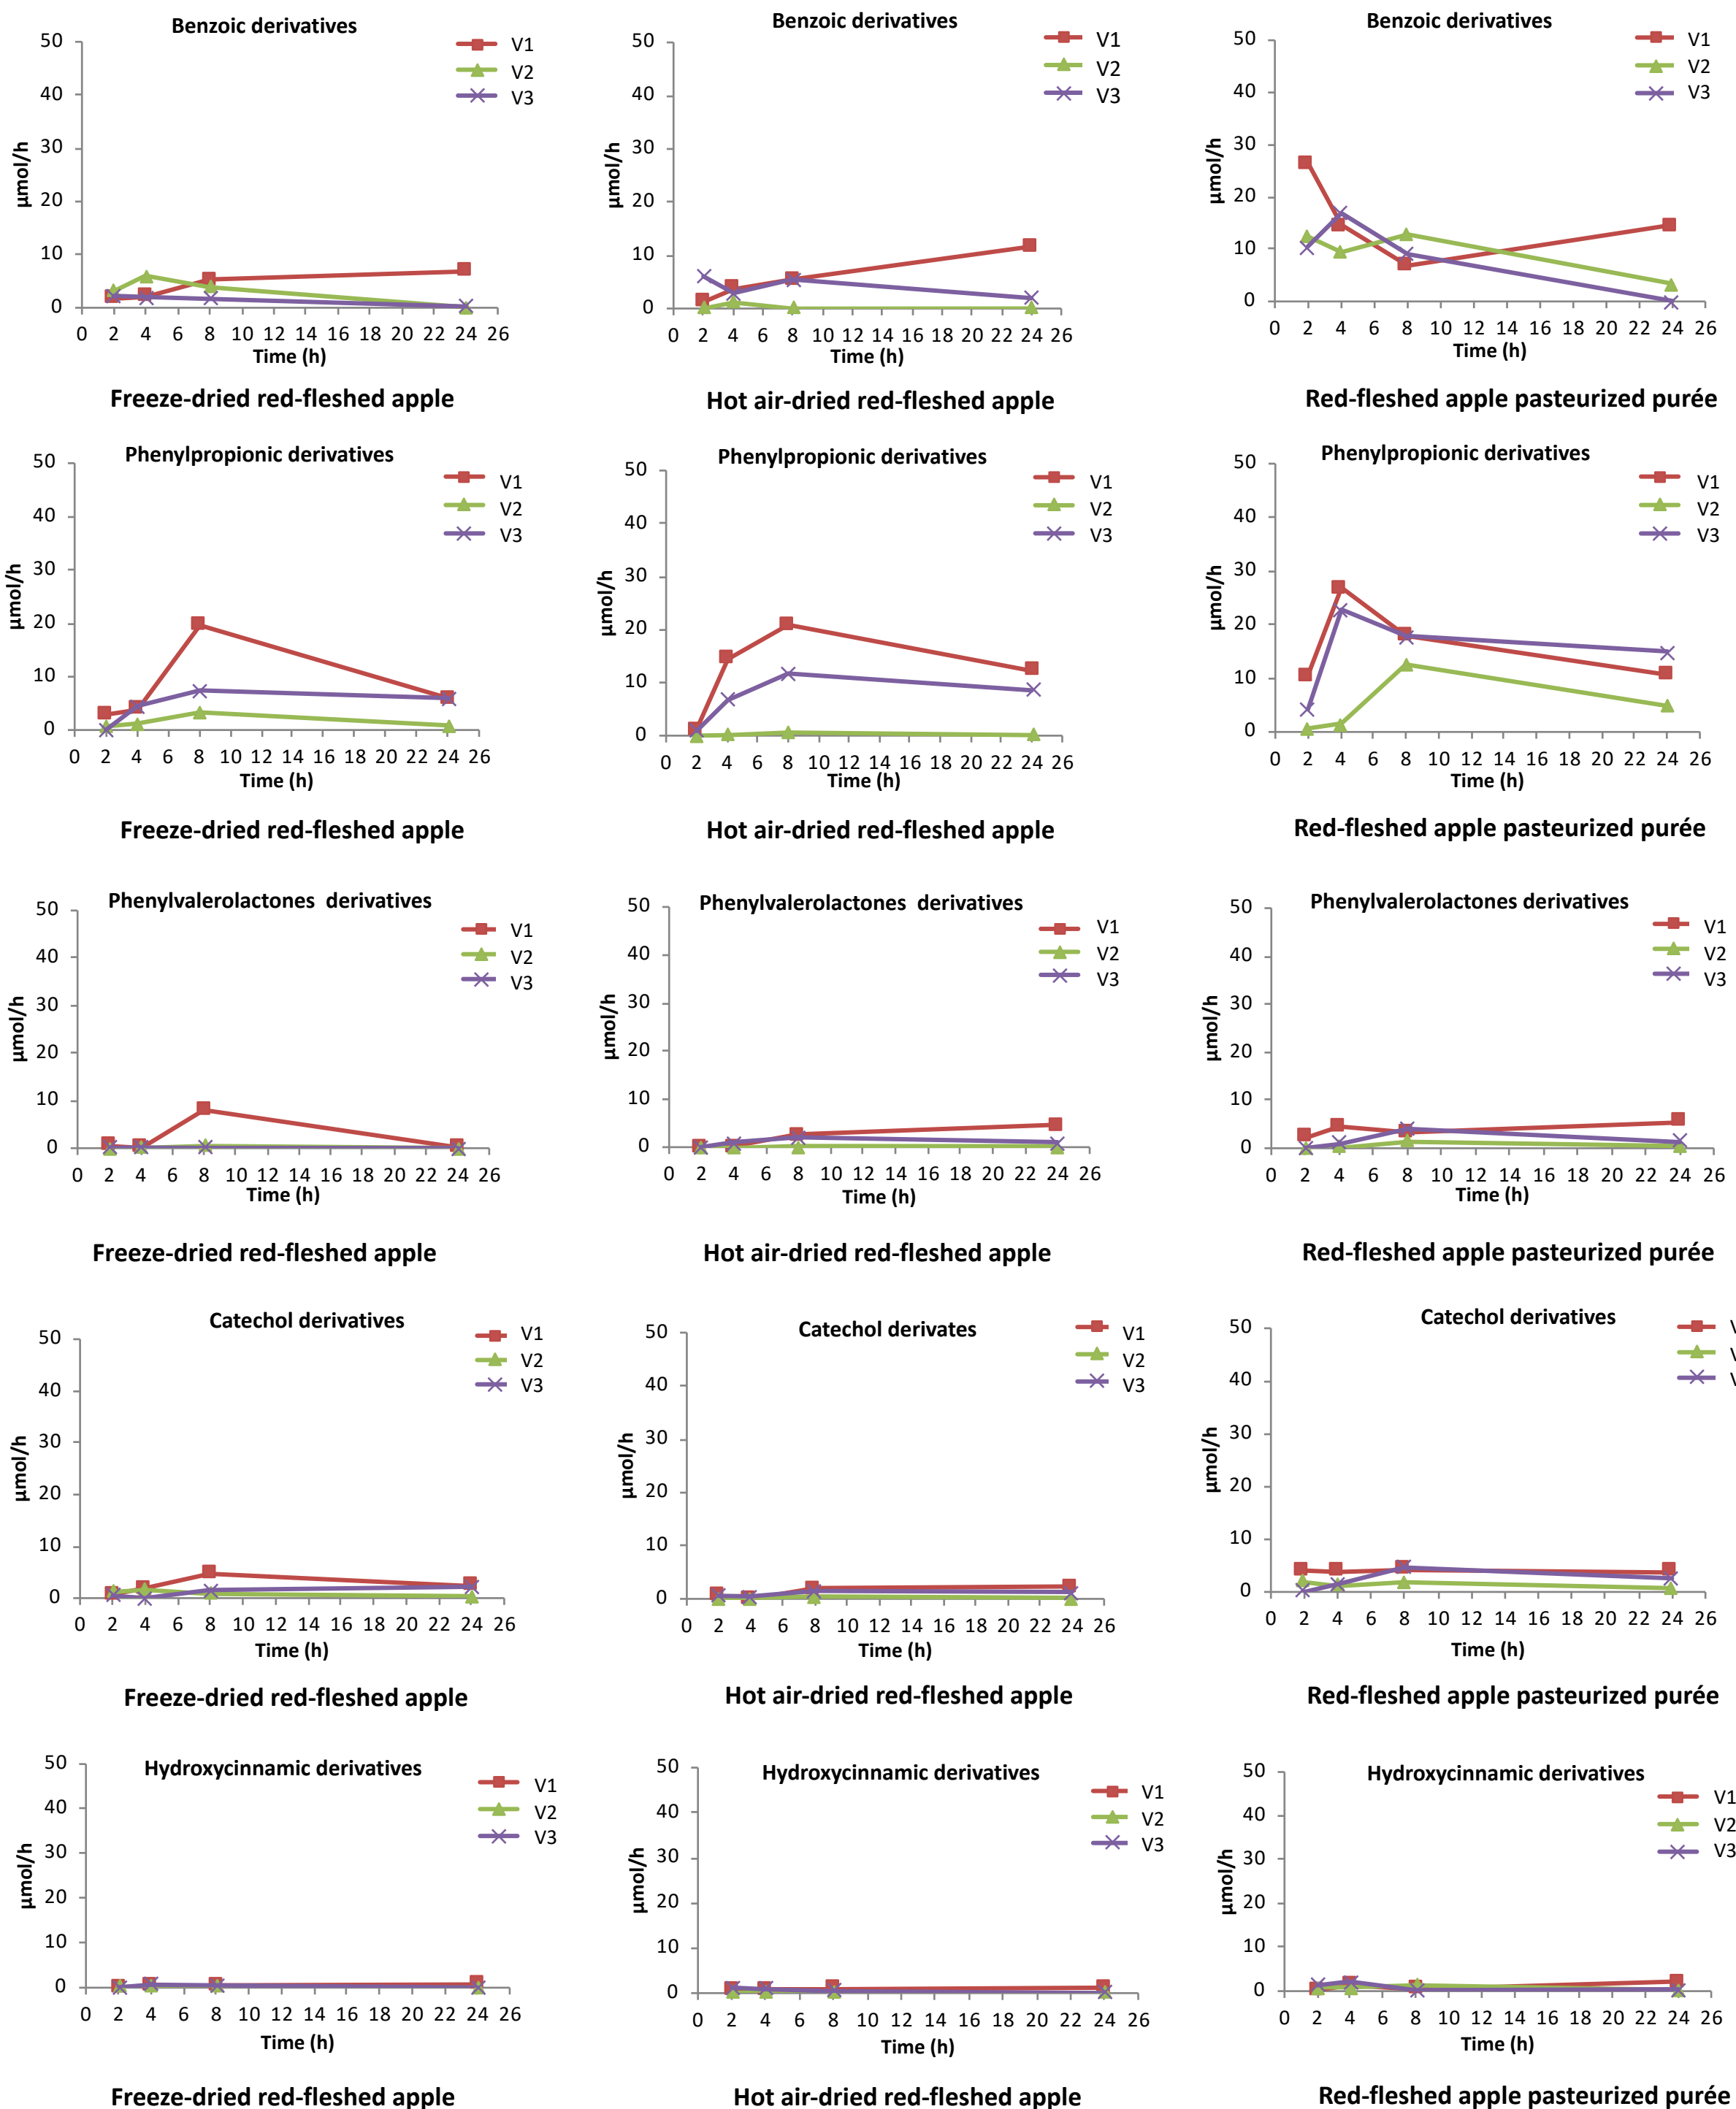

## Supplemental Figure 2

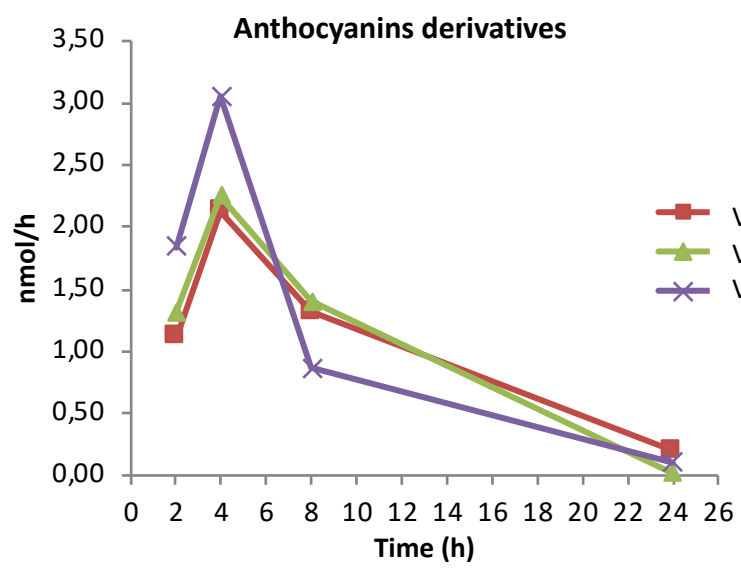

Freeze-dried red-fleshed apple

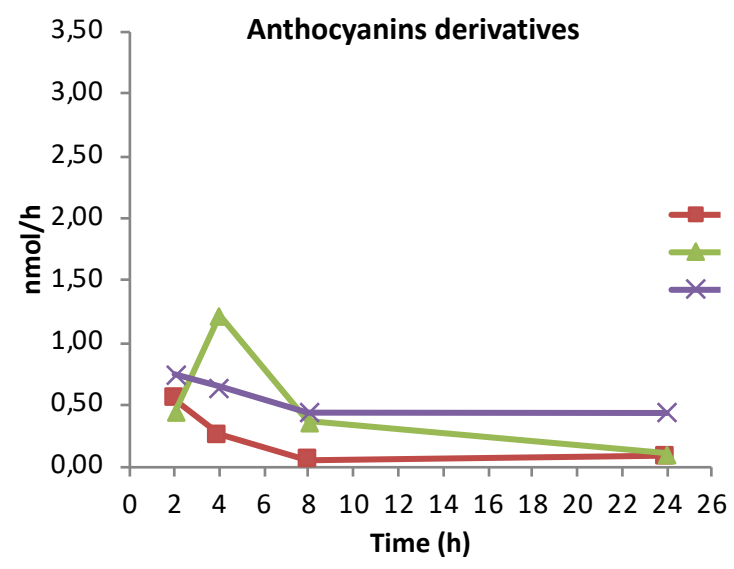

Hot air-dried red-fleshed apple

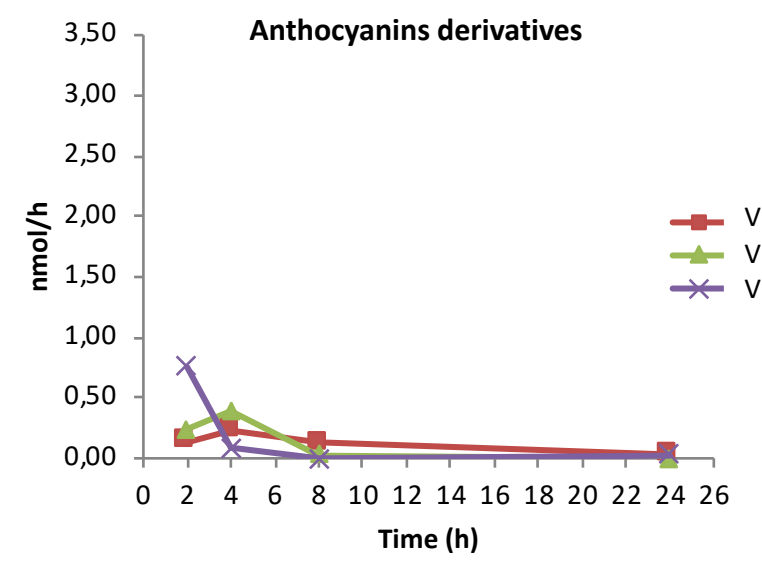

Red-fleshed apple pasteurized purée

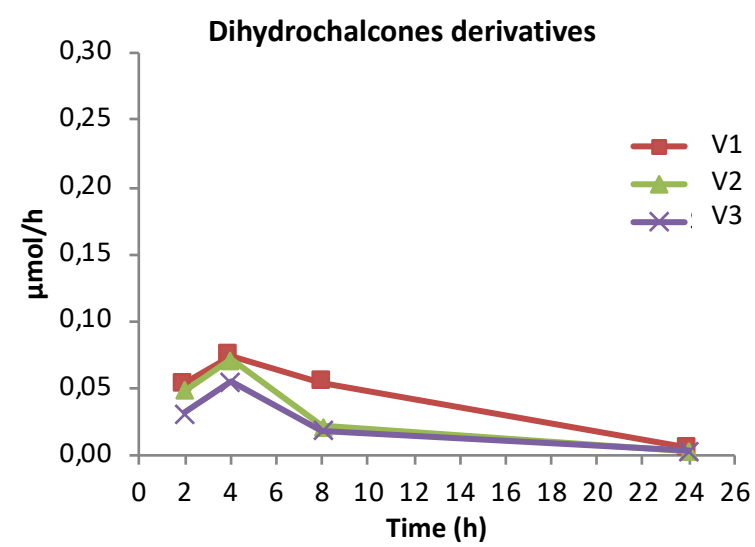

Freeze-dried red-fleshed apple

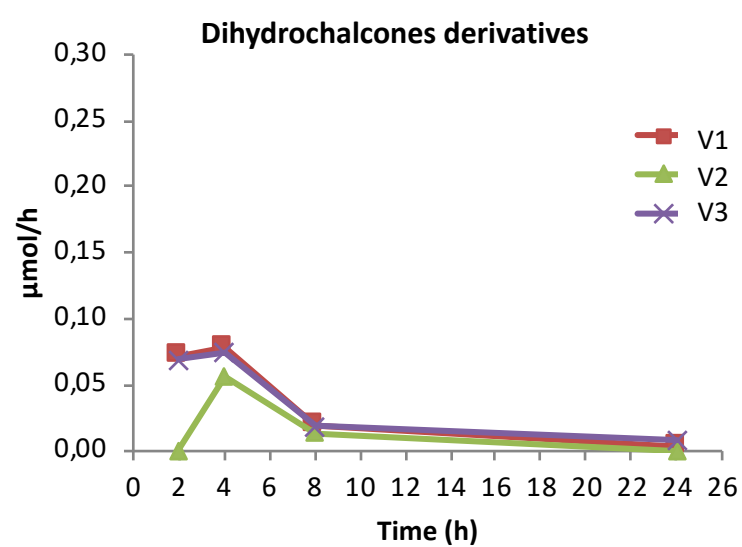

Hot air-dried red-fleshed apple

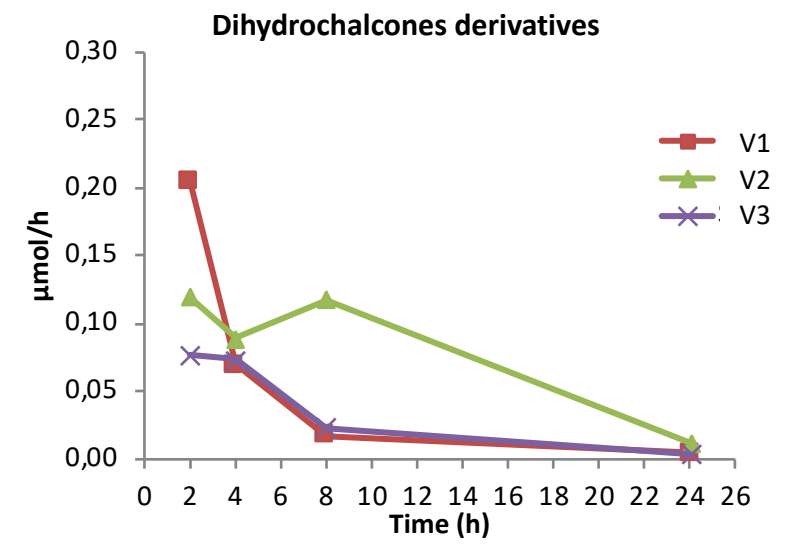

Red-fleshed apple pasteurized purée

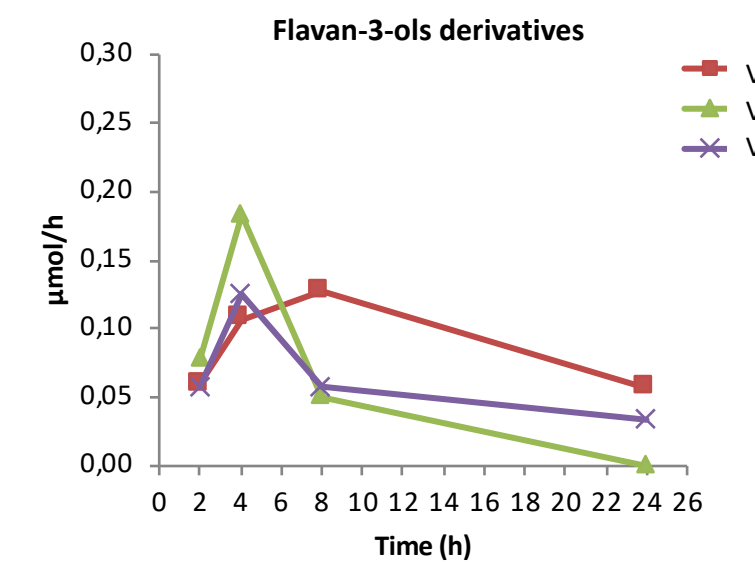

Freeze-dried red-fleshed apple

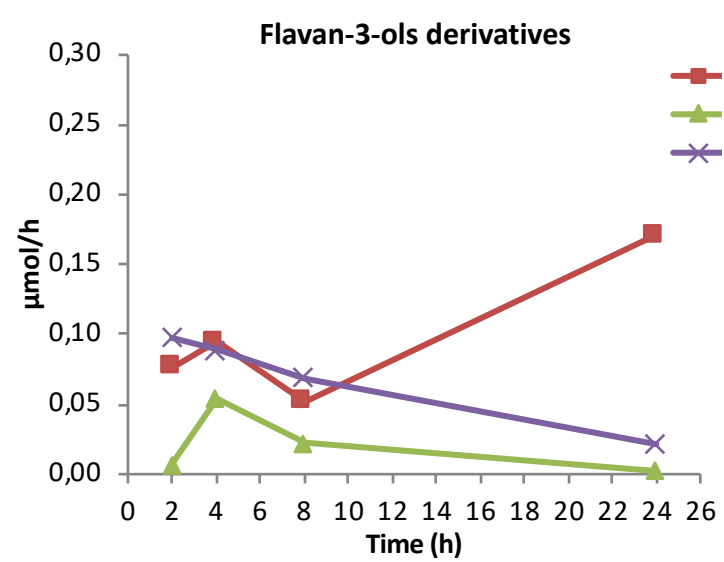

Hot air-dried red-fleshed apple

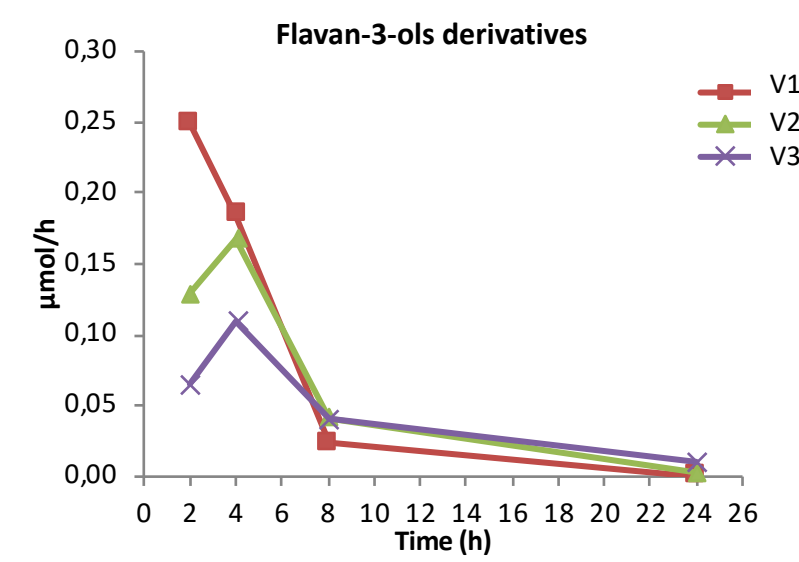

Red-fleshed apple pasteurized purée

# Supplemental Figure 3

## Freeze-dried red-fleshed apple

## Hot air-dried red-fleshed apple

## Red-fleshed apple pasteurized purée

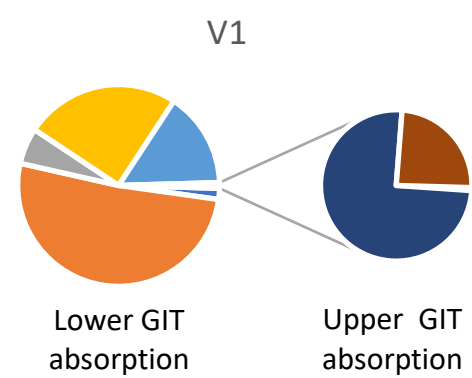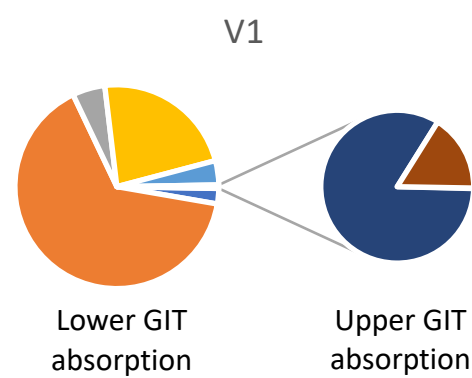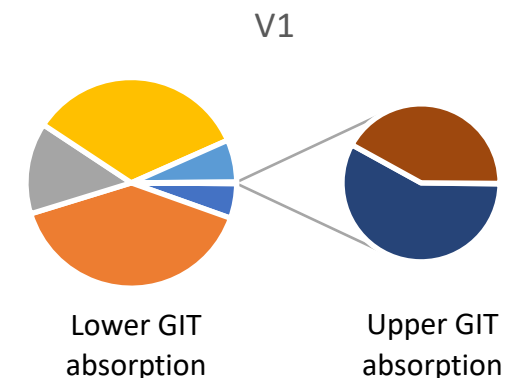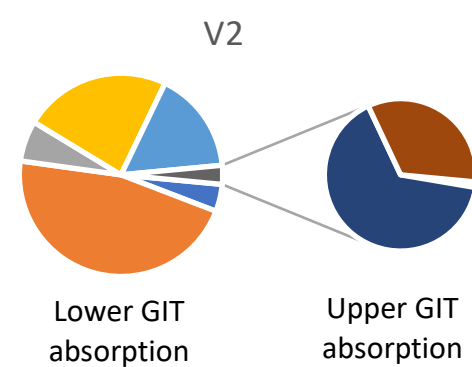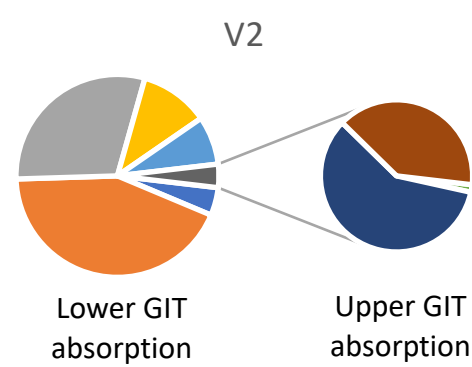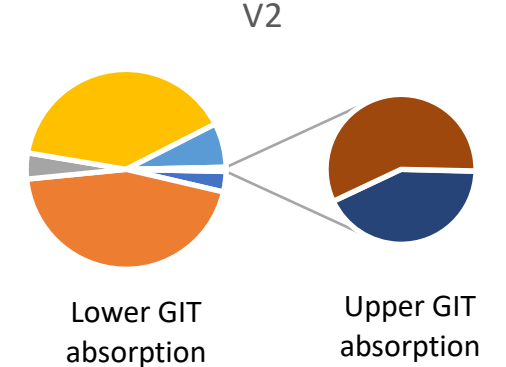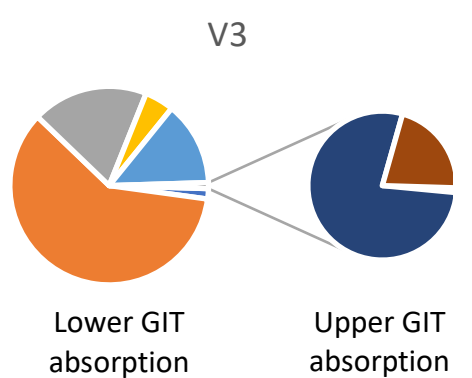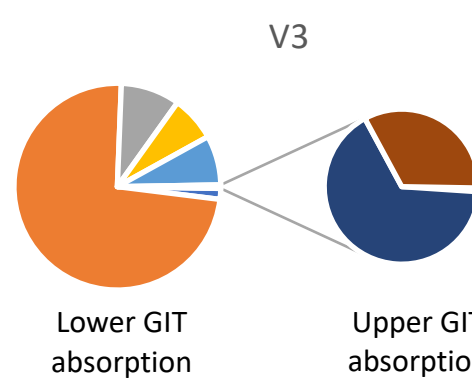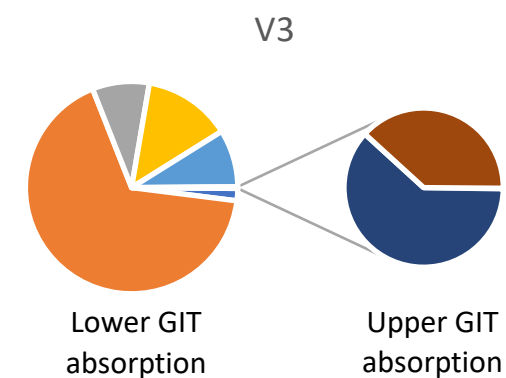

- Hydroxycinnamic acids derivatives
- Phenylvalerolactones derivatives
- Catechols derivatives
- Flavan-3-ols derivatives

- Phenylpropionic acids derivatives
- Benzoic acids derivatives
- Anthocyanins derivatives
- Dihydrochalcones derivatives
