# Supplementary material for: Thermal and non-thermal processing of red-fleshed apple: how are (poly)phenol composition and bioavailability affected?
Source: Royal Society of Chemistry journal article supplement (doi:10.1039/d0fo02631j), 2020-01-01
Supplement: d0fo02631j3.pdf [file d0fo02631j3.pdf]

**Supplemental Table 1.** Concentration of (poly)phenolic compounds in different red-fleshed apple products expressed as mg/ingested portion  $\pm$  SD (portions: red fleshed apple pasteurized purée=500 g, hot air-dried red fleshed apple snack = 66 g, freeze-dried red fleshed apple snack = 60 g).

| Compound (mg/ingested portion)     | Red-fleshed apple pasteurized purée | Hot air-dried red-fleshed apple   | Freeze-dried red-fleshed apple    |
|------------------------------------|-------------------------------------|-----------------------------------|-----------------------------------|
| Cyanidin arabinoside               | 0.36 $\pm$ 0.05                     | 0.47 $\pm$ 0.03                   | 1.72 $\pm$ 0.06                   |
| Cyanidin-3- <i>O</i> -galactoside  | 1.93 $\pm$ 0.09                     | 3.84 $\pm$ 0.20                   | 14.9 $\pm$ 0.23                   |
| <b>TOTAL Anthocyanins</b>          | <b>2.29 <math>\pm</math> 0.12</b>   | <b>4.31 <math>\pm</math> 0.23</b> | <b>16.6 <math>\pm</math> 0.26</b> |
| Protocatechuic acid                | 4.75 $\pm$ 0.09                     | 0.86 $\pm$ 0.03                   | n.d.                              |
| Hydroxytyrosol                     | 0.47 $\pm$ 0.05                     | 0.33 $\pm$ 0.01                   | 0.30 $\pm$ 0.01                   |
| Coumaric acid hexoside             | 1.47 $\pm$ 0.04                     | 1.31 $\pm$ 0.08                   | 0.80 $\pm$ 0.03                   |
| Coumaric acid derivate             | 0.70 $\pm$ 0.01                     | 0.38 $\pm$ 0.09                   | 0.36 $\pm$ 0.05                   |
| Vanillic acid hexoside             | 2.13 $\pm$ 0.38                     | 1.54 $\pm$ 0.05                   | 1.93 $\pm$ 0.07                   |
| Homogentisic acid                  | 0.54 $\pm$ 0.01                     | 0.32 $\pm$ 0.06                   | 0.42 $\pm$ 0.04                   |
| Ferulic acid                       | 0.16 $\pm$ 0.02                     | 0.14 $\pm$ 0.03                   | n.d.                              |
| Ferulic acid hexoside              | 1.07 $\pm$ 0.19                     | 0.08 $\pm$ 0.03                   | 1.07 $\pm$ 0.16                   |
| 5- <i>O</i> -caffeoylquinic acid   | 92.0 $\pm$ 1.10                     | 87.4 $\pm$ 2.30                   | 92.0 $\pm$ 3.50                   |
| <b>TOTAL Phenolic acids</b>        | <b>115 <math>\pm</math> 1.90</b>    | <b>92.4 <math>\pm</math> 2.90</b> | <b>96.9 <math>\pm</math> 3.80</b> |
| Epicatechin                        | 2.65 $\pm$ 0.06                     | 1.61 $\pm$ 0.03                   | 3.17 $\pm$ 0.49                   |
| Epigallocatechin                   | 0.45 $\pm$ 0.03                     | 0.31 $\pm$ 0.01                   | 0.39 $\pm$ 0.04                   |
| Dimer                              | 3.96 $\pm$ 0.23                     | 2.59 $\pm$ 0.16                   | 5.50 $\pm$ 0.51                   |
| Trimer                             | n.d.                                | 1.43 $\pm$ 0.12                   | 2.45 $\pm$ 0.11                   |
| <b>TOTAL Flavan-3-ols</b>          | <b>7.10 <math>\pm</math> 0.29</b>   | <b>5.90 <math>\pm</math> 0.44</b> | <b>11.5 <math>\pm</math> 1.12</b> |
| Quercetin                          | 0.43 $\pm$ 0.04                     | 0.08 $\pm$ 0.01                   | n.d.                              |
| Dihydroquercetin                   | 0.16 $\pm$ 0.03                     | 0.01 $\pm$ 0.00                   | 0.12 $\pm$ 0.06                   |
| Quercetin arabinoside              | 0.46 $\pm$ 0.01                     | 0.21 $\pm$ 0.04                   | 0.38 $\pm$ 0.06                   |
| Quercetin rhamnoside               | 2.43 $\pm$ 0.14                     | 2.15 $\pm$ 0.14                   | 2.11 $\pm$ 0.08                   |
| Quercetin glucoside                | 0.38 $\pm$ 0.04                     | 0.11 $\pm$ 0.00                   | 0.40 $\pm$ 0.08                   |
| Dihydrokaempferol glucoside        | n.d.                                | 0.44 $\pm$ 0.02                   | 0.73 $\pm$ 0.16                   |
| <b>TOTAL Flavonols</b>             | <b>3.86 <math>\pm</math> 0.18</b>   | <b>3.00 <math>\pm</math> 0.20</b> | <b>3.74 <math>\pm</math> 0.12</b> |
| Naringenin glucoside               | 0.54 $\pm$ 0.09                     | 0.24 $\pm$ 0.03                   | 0.37 $\pm$ 0.05                   |
| Eriodictyol hexoside               | 0.78 $\pm$ 0.06                     | 0.44 $\pm$ 0.06                   | 0.54 $\pm$ 0.01                   |
| <b>TOTAL Flavanones</b>            | <b>1.32 <math>\pm</math> 0.16</b>   | <b>0.68 <math>\pm</math> 0.09</b> | <b>0.91 <math>\pm</math> 0.06</b> |
| Phloretin glucoside                | 7.82 $\pm$ 1.92                     | 6.84 $\pm$ 0.46                   | 4.88 $\pm$ 1.09                   |
| Phloretin xylosyl glucoside        | 16.4 $\pm$ 1.47                     | 7.52 $\pm$ 0.59                   | 11.8 $\pm$ 0.89                   |
| Hydroxyphloretin xylosyl glucoside | 1.71 $\pm$ 0.33                     | 1.58 $\pm$ 0.35                   | 1.01 $\pm$ 0.20                   |
| <b>TOTAL Dihydrochalcones</b>      | <b>25.9 <math>\pm</math> 2.20</b>   | <b>15.9 <math>\pm</math> 0.58</b> | <b>17.7 <math>\pm</math> 1.02</b> |
| <b>TOTAL Rest (poly)phenolics</b>  | <b>153 <math>\pm</math> 2.10</b>    | <b>118 <math>\pm</math> 2.30</b>  | <b>131 <math>\pm</math> 3.90</b>  |
| <b>TOTAL (POLY)PHENOLICS</b>       | <b>155 <math>\pm</math> 2.20</b>    | <b>122 <math>\pm</math> 2.50</b>  | <b>148 <math>\pm</math> 4.00</b>  |

n.d.: not detected

**Supplemental Table 2.** SRM conditions used for the analysis of (poly)phenolic and their generated metabolites.

| Phenolic metabolites                                          | SRM Quantification | CV (V) / CE (eV) | Standard in which has been quantified    |
|---------------------------------------------------------------|--------------------|------------------|------------------------------------------|
| <i>Catechols</i>                                              |                    |                  |                                          |
| Catechol sulphate                                             | 189 > 109          | 20 / 15          | Catechol-4- <i>O</i> -sulphate           |
| Methyl catechol sulphate                                      | 203 > 123          | 20 / 15          | 4-methyl catechol sulphate               |
| Catechol glucuronide                                          | 285 > 109          | 20 / 15          | Catechol-4- <i>O</i> -sulphate           |
| Methyl catechol glucuronide                                   | 299 > 123          | 20 / 15          | 4-methyl catechol sulphate               |
| <i>Benzoic acids</i>                                          |                    |                  |                                          |
| Vanillic acid                                                 | 167 > 123          | 30 / 10          | Vanillic acid                            |
| Vanillic acid sulphate                                        | 247 > 167          | 30 / 25          | Vanillic acid-4- <i>O</i> -sulphate      |
| Vanillic acid glucuronide                                     | 343 > 167          | 30 / 25          | Vanillic acid                            |
| Homovanillic acid                                             | 181 > 137          | 40 / 15          | Vanillic acid                            |
| Homovanillic acid sulphate                                    | 261 > 181          | 40 / 15          | Vanillic acid                            |
| Protocatechuic acid                                           | 153 > 109          | 45 / 15          | Protocatechuic acid                      |
| Protocatechuic acid sulphate                                  | 233 > 153          | 35 / 15          | Protocatechuic acid                      |
| Protocatechuic acid glucuronide                               | 329 > 153          | 35 / 15          | Protocatechuic acid                      |
| Hydroxytyrosol sulphate                                       | 233 > 123          | 35 / 15          | Hydroxytyrosol                           |
| Hydroxytyrosol glucuronide                                    | 329 > 123          | 35 / 20          | Hydroxytyrosol                           |
| Hydroxybenzoic acid                                           | 137 > 93           | 30 / 15          | <i>p</i> -Hydroxybenzoic acid            |
| Hydroxybenzoic acid sulphate                                  | 217 > 137          | 35 / 15          | <i>p</i> -Hydroxybenzoic acid            |
| Hydroxybenzoic acid glucuronide                               | 313 > 137          | 35 / 15          | <i>p</i> -Hydroxybenzoic acid            |
| Hydroxyhippuric acid                                          | 194 > 100          | 40 / 10          | <i>p</i> -Hydroxybenzoic acid            |
| <i>Phenylpropionic acids</i>                                  |                    |                  |                                          |
| Hydroxyphenylpropionic acid                                   | 165 > 121          | 20 / 10          | 3-(3'-hydroxyphenyl)propionic acid       |
| Hydroxyphenylpropionic acid sulphate                          | 245 > 165          | 35 / 15          | 3-(3'-hydroxyphenyl)propionic acid       |
| Hydroxyphenylpropionic acid glucuronide                       | 341 > 165          | 40 / 25          | 3-(3'-hydroxyphenyl)propionic acid       |
| Dihydroxyphenylpropionic acid                                 | 181 > 137          | 35 / 15          | 3-(3',4'-dihydroxyphenyl) propionic acid |
| Dihydroxyphenylpropionic acid sulphate                        | 261 > 181          | 40 / 15          | 3-(3',4'-dihydroxyphenyl) propionic acid |
| Dihydrocaffeic acid glucuronide                               | 357 > 181          | 40 / 10          | 3-(3',4'-dihydroxyphenyl) propionic acid |
| <i>Hydroxycinnamic acid derivatives</i>                       |                    |                  |                                          |
| Coumaric acid                                                 | 163 > 119          | 35 / 10          | <i>p</i> -coumaric acid                  |
| Coumaric acid sulphate                                        | 243 > 163          | 35 / 15          | <i>p</i> -coumaric acid                  |
| Caffeic acid sulphate                                         | 259 > 179          | 35 / 15          | Caffeic acid                             |
| Caffeic acid glucuronide                                      | 355 > 179          | 35 / 15          | Caffeic acid                             |
| Ferulic acid                                                  | 193 > 134          | 30 / 15          | Ferulic acid                             |
| Ferulic acid sulphate                                         | 273 > 193          | 35 / 15          | Ferulic acid                             |
| Ferulic acid glucuronide                                      | 369 > 193          | 35 / 15          | Ferulic acid                             |
| Dihydroferulic acid                                           | 195 > 136          | 35 / 10          | Ferulic acid                             |
| Dihydroferulic acid sulphate                                  | 275 > 195          | 35 / 15          | Ferulic acid                             |
| Dihydroferulic acid glucuronide                               | 371 > 195          | 35 / 20          | Ferulic acid                             |
| <i>Phenyl-<math>\gamma</math>-valerolactone derivatives</i>   |                    |                  |                                          |
| Hydroxyphenyl- $\gamma$ -valerolactone sulphate               | 271 > 191          | 40 / 20          | Epicatechin                              |
| Dihydroxyphenyl- $\gamma$ -valerolactone sulphate             | 287 > 207          | 40 / 15          | Epicatechin                              |
| Dihydroxyphenyl- $\gamma$ -valerolactone glucuronide          | 383 > 207          | 40 / 20          | Epicatechin                              |
| Dihydroxyphenyl- $\gamma$ -valerolactone sulphate glucuronide | 383 > 207          | 40 / 20          | Epicatechin                              |
| Dihydroxyphenylvaleric acid                                   | 209 > 135          | 40 / 15          | Epicatechin                              |
| <i>Flavan-3-ol</i>                                            |                    |                  |                                          |
| Catechin sulphate                                             | 369 > 289          | 40 / 15          | Catechin                                 |
| Epicatechin sulphate                                          | 369 > 289          | 40 / 15          | Epicatechin                              |
| Methyl catechin sulphate                                      | 383 > 303          | 40 / 15          | Catechin                                 |
| Methyl epicatechin sulphate                                   | 383 > 303          | 40 / 15          | Epicatechin                              |
| Catechin glucuronide                                          | 465 > 289          | 40 / 20          | Catechin                                 |
| Epicatechin glucuronide                                       | 465 > 289          | 40 / 20          | Epicatechin                              |
| Methyl catechin glucuronide                                   | 383 > 303          | 40 / 15          | Catechin                                 |
| Methyl epicatechin glucuronide                                | 383 > 303          | 40 / 15          | Epicatechin                              |

*Dihydrochalcones*

|                                |           |         |                                   |
|--------------------------------|-----------|---------|-----------------------------------|
| Phloretin glucuronide          | 449 > 273 | 40 / 20 | Phloretin-2'- <i>O</i> -glucoside |
| Phloretin sulphate             | 353 > 273 | 40 / 20 | Phloretin-2'- <i>O</i> -glucoside |
| Phloretin sulphate glucuronide | 529 > 353 | 40 / 20 | Phloretin-2'- <i>O</i> -glucoside |

*Anthocyanins*

|                                   |           |         |                                   |
|-----------------------------------|-----------|---------|-----------------------------------|
| Cyanidin arabinoside              | 419 > 287 | 40 / 20 | Cyanidin-3- <i>O</i> -galactoside |
| Cyanidin-3- <i>O</i> -galactoside | 449 > 287 | 40 / 20 | Cyanidin-3- <i>O</i> -galactoside |
| Cyanidin glucuronide              | 463 > 287 | 40 / 20 | Cyanidin-3- <i>O</i> -galactoside |
| Peonidin galactoside              | 463 > 301 | 40 / 20 | Cyanidin-3- <i>O</i> -galactoside |
| Peonidin glucuronide              | 477 > 301 | 40 / 20 | Cyanidin-3- <i>O</i> -galactoside |
| Methyl peonidin glucuronide       | 491 > 315 | 40 / 20 | Cyanidin-3- <i>O</i> -galactoside |
| Cyanidin sulphate glucuronide     | 543 > 367 | 40 / 20 | Cyanidin-3- <i>O</i> -galactoside |
| Cyanidin galactoside glucuronide  | 625 > 463 | 40 / 20 | Cyanidin-3- <i>O</i> -galactoside |
| Peonidin galactoside glucuronide  | 639 > 463 | 40 / 20 | Cyanidin-3- <i>O</i> -galactoside |

---

CV: Cone voltage

CE: Collision energy

**Supplemental Table 3.** Amount of the main (poly)phenolic groups (mean  $\pm$  SD) excreted in urine (0-24h) after the intake of freeze-dried red-fleshed apple, hot air-dried red-fleshed apple and red-fleshed apple pasteurized purée.

| Compounds                                       | Freeze-dried red-fleshed apple                    |                                                    |                                                   | Hot air-dried red-fleshed apple                    |                                                    |                                                    | Red-fleshed apple pasteurized purée                 |                                                    |                                                     |
|-------------------------------------------------|---------------------------------------------------|----------------------------------------------------|---------------------------------------------------|----------------------------------------------------|----------------------------------------------------|----------------------------------------------------|-----------------------------------------------------|----------------------------------------------------|-----------------------------------------------------|
|                                                 | V1                                                | V2                                                 | V3                                                | V1                                                 | V2                                                 | V3                                                 | V1                                                  | V2                                                 | V3                                                  |
| Benzoic acids                                   | 62.6 $\pm$ 2.51 <sup>b</sup><br>*                 | 8.47 $\pm$ 0.40 <sup>a</sup><br>+                  | 6.90 $\pm$ 0.36 <sup>a</sup><br>#                 | 105 $\pm$ 5.43 <sup>C</sup><br>**                  | 1.19 $\pm$ 0.06 <sup>A</sup><br>+                  | 18.5 $\pm$ 1.01 <sup>B</sup><br>##                 | 236 $\pm$ 13.4 <sup>3</sup><br>***                  | 107 $\pm$ 5.91 <sup>2</sup><br>++                  | 57.1 $\pm$ 2.82 <sup>1</sup><br>###                 |
| Phenylpropionic acids derivatives               | 129 $\pm$ 5.73 <sup>c</sup><br>*                  | 16.5 $\pm$ 0.89 <sup>a</sup><br>+                  | 86.8 $\pm$ 5.01 <sup>b</sup><br>#                 | 300 $\pm$ 16.2 <sup>C</sup><br>**                  | 4.67 $\pm$ 0.22 <sup>A</sup><br>+                  | 192 $\pm$ 10.5 <sup>B</sup><br>##                  | 276 $\pm$ 16.3 <sup>2</sup><br>**                   | 119 $\pm$ 8.12 <sup>1</sup><br>++                  | 282 $\pm$ 18.4 <sup>2</sup><br>###                  |
| Phenylvalerolactones derivatives                | 14.5 $\pm$ 0.74 <sup>b</sup><br>*                 | 2.31 $\pm$ 0.12 <sup>a</sup><br>+                  | 27.6 $\pm$ 1.15 <sup>c</sup><br>#                 | 23.9 $\pm$ 1.00 <sup>B</sup><br>*                  | 3.21 $\pm$ 0.17 <sup>A</sup><br>+                  | 24.4 $\pm$ 0.95 <sup>B</sup><br>#                  | 97.7 $\pm$ 5.29 <sup>3</sup><br>**                  | 11.4 $\pm$ 0.57 <sup>1</sup><br>++                 | 36.9 $\pm$ 1.89 <sup>2</sup><br>##                  |
| Catechols derivatives                           | 38.2 $\pm$ 1.94 <sup>c</sup><br>**                | 5.87 $\pm$ 0.23 <sup>a</sup><br>++                 | 20.0 $\pm$ 0.90 <sup>b</sup><br>#                 | 17.8 $\pm$ 0.77 <sup>B</sup><br>*                  | 0.83 $\pm$ 0.05 <sup>A</sup><br>+                  | 20.4 $\pm$ 0.92 <sup>B</sup><br>#                  | 45.7 $\pm$ 1.99 <sup>3</sup><br>***                 | 19.6 $\pm$ 0.55 <sup>1</sup><br>+++                | 37.4 $\pm$ 1.59 <sup>2</sup><br>##                  |
| <b>Major metabolites</b>                        |                                                   |                                                    |                                                   |                                                    |                                                    |                                                    |                                                     |                                                    |                                                     |
| Anthocyanins derivatives                        | 0.02 $\pm$ 0.00 <sup>a</sup><br>**                | 0.01 $\pm$ 0.00 <sup>a</sup><br>+++                | 0.01 $\pm$ 0.00 <sup>a</sup><br>##                | 0.00 $\pm$ 0.00 <sup>A</sup><br>*                  | 0.01 $\pm$ 0.00 <sup>B</sup><br>++                 | 0.01 $\pm$ 0.00 <sup>C</sup><br>##                 | 0.00 $\pm$ 0.00 <sup>1</sup><br>*                   | 0.00 $\pm$ 0.00 <sup>1</sup><br>+                  | 0.00 $\pm$ 0.00 <sup>1</sup><br>#                   |
| Flavan-3-ols derivatives                        | 1.70 $\pm$ 0.07 <sup>c</sup><br>**                | 0.70 $\pm$ 0.04 <sup>a</sup><br>++                 | 1.09 $\pm$ 0.07 <sup>b</sup><br>##                | 2.14 $\pm$ 0.11 <sup>C</sup><br>***                | 0.24 $\pm$ 0.01 <sup>A</sup><br>+                  | 0.95 $\pm$ 0.06 <sup>B</sup><br>##                 | 0.92 $\pm$ 0.05 <sup>2</sup><br>*                   | 0.77 $\pm$ 0.05 <sup>1,2</sup><br>++               | 0.65 $\pm$ 0.04 <sup>1</sup><br>#                   |
| Dihydrochalcones derivatives                    | 0.55 $\pm$ 0.02 <sup>b</sup><br>**                | 0.36 $\pm$ 0.02 <sup>a</sup><br>++                 | 0.30 $\pm$ 0.01 <sup>a</sup><br>#                 | 0.42 $\pm$ 0.02 <sup>B</sup><br>*                  | 0.16 $\pm$ 0.01 <sup>A</sup><br>+                  | 0.48 $\pm$ 0.02 <sup>B</sup><br>##                 | 0.68 $\pm$ 0.03 <sup>2</sup><br>***                 | 1.03 $\pm$ 0.07 <sup>3</sup><br>+++                | 0.41 $\pm$ 0.02 <sup>1</sup><br>##                  |
| Hydroxycinnamic acids derivatives               | 4.45 $\pm$ 0.21 <sup>c</sup><br>*                 | 1.53 $\pm$ 0.10 <sup>a</sup><br>+                  | 2.44 $\pm$ 0.14 <sup>b</sup><br>#                 | 11.2 $\pm$ 0.59 <sup>C</sup><br>**                 | 0.48 $\pm$ 0.02 <sup>A</sup><br>+                  | 4.39 $\pm$ 0.28 <sup>B</sup><br>##                 | 37.1 $\pm$ 1.93 <sup>2</sup><br>***                 | 8.84 $\pm$ 0.54 <sup>1</sup><br>++                 | 7.93 $\pm$ 0.40 <sup>1</sup><br>###                 |
| <b>Minor metabolites</b>                        |                                                   |                                                    |                                                   |                                                    |                                                    |                                                    |                                                     |                                                    |                                                     |
| <b>TOTAL METABOLITES (<math>\mu</math>mols)</b> | <b>250 <math>\pm</math> 11.5<sup>c</sup></b><br>* | <b>35.6 <math>\pm</math> 2.04<sup>a</sup></b><br>+ | <b>145 <math>\pm</math> 6.11<sup>b</sup></b><br># | <b>460 <math>\pm</math> 24.1<sup>C</sup></b><br>** | <b>10.8 <math>\pm</math> 0.54<sup>A</sup></b><br>+ | <b>261 <math>\pm</math> 13.7<sup>B</sup></b><br>## | <b>694 <math>\pm</math> 39.0<sup>3</sup></b><br>*** | <b>268 <math>\pm</math> 15.8<sup>1</sup></b><br>++ | <b>422 <math>\pm</math> 25.2<sup>2</sup></b><br>### |

The values were compared inter-individual and intra-individual (One-way ANOVA, Tukey's test between all means,  $p < 0.05$ ).

Different lowercase letters: indicates differences between volunteers in excretion of (poly)phenols after the intake of freeze-dried red-fleshed apple.

Different capital letters: indicates differences between volunteers in excretion of (poly)phenols after the intake of hot air-dried red-fleshed apple.

Different numbers: indicates differences between volunteers in excretion of (poly)phenols after the intake of red-fleshed apple pasteurized purée.

The symbols \*, +, and # indicate differences between the 3 intakes for the same volunteer.

**Supplemental Table 4.** Amount of the (poly)phenolic compounds (mean  $\pm$  SD) excreted in urine (0-24h) after the intake of freeze-dried red-fleshed apple, hot air-dried red-fleshed apple and red-fleshed apple pasteurized purée for each of the 3 volunteers.

| Phenolic compound                                              | Freeze-dried red-fleshed apple |                 |                 | Hot air-dried red-fleshed apple |                 |                 | Red-fleshed apple pasteurized purée |                 |                 |
|----------------------------------------------------------------|--------------------------------|-----------------|-----------------|---------------------------------|-----------------|-----------------|-------------------------------------|-----------------|-----------------|
|                                                                | V1                             | V2              | V3              | V1                              | V2              | V3              | V1                                  | V2              | V3              |
| <i>Anthocyanins derivatives (nmols)</i>                        |                                |                 |                 |                                 |                 |                 |                                     |                 |                 |
| Cyanidin arabinoside                                           | 3.30 $\pm$ 0.14                | 0.06 $\pm$ 0.01 | 2.64 $\pm$ 0.42 | 0.48 $\pm$ 0.10                 | 0.75 $\pm$ 0.36 | 1.58 $\pm$ 0.24 | 0.79 $\pm$ 0.15                     | 1.75 $\pm$ 0.26 | 0.07 $\pm$ 0.01 |
| Cyanidin galactoside                                           | 0.52 $\pm$ 0.30                | 1.10 $\pm$ 0.06 | 0.66 $\pm$ 0.05 | 0.14 $\pm$ 0.02                 | 0.67 $\pm$ 0.06 | 0.83 $\pm$ 0.03 | 0.27 $\pm$ 0.01                     | n.d.            | 0.28 $\pm$ 0.01 |
| Cyanidin glucuronide                                           | 6.69 $\pm$ 0.61                | 3.94 $\pm$ 0.26 | 4.52 $\pm$ 0.99 | 0.30 $\pm$ 0.06                 | 1.83 $\pm$ 0.23 | 7.06 $\pm$ 0.38 | 0.74 $\pm$ 0.22                     | n.d.            | 0.60 $\pm$ 0.03 |
| Peonidin galactoside                                           | 0.18 $\pm$ 0.12                | 1.24 $\pm$ 0.12 | 1.01 $\pm$ 0.13 | 1.56 $\pm$ 0.51                 | 0.38 $\pm$ 0.10 | 0.93 $\pm$ 0.07 | 0.33 $\pm$ 0.01                     | n.d.            | 0.42 $\pm$ 0.06 |
| Peonidin glucuronide                                           | 0.59 $\pm$ 0.09                | 2.68 $\pm$ 0.41 | 3.18 $\pm$ 0.07 | 0.65 $\pm$ 0.29                 | 0.82 $\pm$ 0.10 | 0.02 $\pm$ 0.00 | n.d.                                | n.d.            | n.d.            |
| Methyl peonidin glucuronide                                    | 2.52 $\pm$ 0.71                | 1.17 $\pm$ 0.12 | 1.68 $\pm$ 0.08 | n.d.                            | n.d.            | 0.38 $\pm$ 0.06 | n.d.                                | n.d.            | n.d.            |
| Cyanidin sulphate glucuronide                                  | 0.67 $\pm$ 0.13                | 0.85 $\pm$ 0.15 | 0.35 $\pm$ 0.06 | 0.07 $\pm$ 0.03                 | 2.19 $\pm$ 0.10 | 0.83 $\pm$ 0.23 | n.d.                                | n.d.            | n.d.            |
| Cyanidin galactoside glucuronide                               | n.d.                           | 1.40 $\pm$ 0.21 | n.d.            | n.d.                            | 0.03 $\pm$ 0.00 | n.d.            | n.d.                                | n.d.            | n.d.            |
| Peonidin galactoside glucuronide                               | 0.61 $\pm$ 0.10                | 0.77 $\pm$ 0.03 | 0.86 $\pm$ 0.03 | 0.07 $\pm$ 0.01                 | 0.11 $\pm$ 0.01 | 0.04 $\pm$ 0.00 | n.d.                                | n.d.            | n.d.            |
| <i>Catechols derivatives (<math>\mu</math>mols)</i>            |                                |                 |                 |                                 |                 |                 |                                     |                 |                 |
| Catechol sulphate                                              | 15.1 $\pm$ 0.55                | 4.67 $\pm$ 0.17 | 7.84 $\pm$ 0.30 | 10.2 $\pm$ 0.37                 | 0.26 $\pm$ 0.02 | 9.76 $\pm$ 0.36 | 22.9 $\pm$ 0.65                     | 17.2 $\pm$ 0.56 | 23.9 $\pm$ 0.87 |
| Methyl catechol sulphate                                       | 19.9 $\pm$ 1.02                | 0.77 $\pm$ 0.04 | 11.1 $\pm$ 0.54 | 6.25 $\pm$ 0.32                 | n.d.            | 9.18 $\pm$ 0.47 | 18.8 $\pm$ 1.18                     | 1.89 $\pm$ 0.02 | 11.5 $\pm$ 0.59 |
| Catechol glucuronide                                           | 0.77 $\pm$ 0.04                | 0.30 $\pm$ 0.02 | 0.39 $\pm$ 0.02 | n.d.                            | 0.27 $\pm$ 0.02 | 0.46 $\pm$ 0.03 | 0.62 $\pm$ 0.09                     | 0.24 $\pm$ 0.04 | 0.48 $\pm$ 0.03 |
| Methyl catechol glucuronide                                    | 2.49 $\pm$ 0.34                | 0.14 $\pm$ 0.01 | 0.67 $\pm$ 0.04 | 1.37 $\pm$ 0.08                 | 0.30 $\pm$ 0.01 | 0.94 $\pm$ 0.06 | 3.25 $\pm$ 0.07                     | 0.31 $\pm$ 0.01 | 1.57 $\pm$ 0.10 |
| <i>Flavan-3-ols derivatives (<math>\mu</math>mols)</i>         |                                |                 |                 |                                 |                 |                 |                                     |                 |                 |
| Catechin sulphate                                              | n.d.                           | 0.09 $\pm$ 0.01 | 0.07 $\pm$ 0.00 | n.d.                            | 0.09 $\pm$ 0.00 | n.d.            | n.d.                                | 0.09 $\pm$ 0.00 | n.d.            |
| Epicatechin sulphate                                           | 1.32 $\pm$ 0.05                | 0.24 $\pm$ 0.02 | 0.37 $\pm$ 0.02 | 0.20 $\pm$ 0.01                 | 0.10 $\pm$ 0.00 | 0.40 $\pm$ 0.03 | 0.25 $\pm$ 0.01                     | 0.16 $\pm$ 0.01 | 0.15 $\pm$ 0.01 |
| Methyl catechin sulphate                                       | n.d.                           | n.d.            | 0.17 $\pm$ 0.01 | 0.68 $\pm$ 0.03                 | n.d.            | 0.17 $\pm$ 0.01 | 0.35 $\pm$ 0.02                     | n.d.            | n.d.            |
| Methyl epicatechin sulphate                                    | n.d.                           | 0.25 $\pm$ 0.01 | n.d.            | 0.36 $\pm$ 0.02                 | n.d.            | n.d.            | 0.05 $\pm$ 0.00                     | 0.26 $\pm$ 0.02 | 0.15 $\pm$ 0.01 |
| Catechin glucuronide                                           | 0.20 $\pm$ 0.01                | n.d.            | 0.39 $\pm$ 0.03 | 0.34 $\pm$ 0.02                 | n.d.            | 0.28 $\pm$ 0.01 | 0.16 $\pm$ 0.01                     | 0.13 $\pm$ 0.01 | 0.27 $\pm$ 0.02 |
| Epicatechin glucuronide                                        | 0.19 $\pm$ 0.01                | 0.10 $\pm$ 0.00 | 0.09 $\pm$ 0.01 | 0.05 $\pm$ 0.00                 | 0.05 $\pm$ 0.00 | 0.09 $\pm$ 0.00 | 0.12 $\pm$ 0.01                     | 0.13 $\pm$ 0.01 | 0.08 $\pm$ 0.01 |
| Methyl catechin glucuronide                                    | n.d.                           | n.d.            | n.d.            | 0.22 $\pm$ 0.01                 | n.d.            | n.d.            | n.d.                                | n.d.            | n.d.            |
| Methyl epicatechin glucuronide                                 | n.d.                           | n.d.            | n.d.            | 0.29 $\pm$ 0.01                 | n.d.            | n.d.            | n.d.                                | n.d.            | n.d.            |
| <i>Phenylvalerolactones derivatives (<math>\mu</math>mols)</i> |                                |                 |                 |                                 |                 |                 |                                     |                 |                 |
| Hydroxyphenyl- $\gamma$ -valerolactone sulphate                | 1.53 $\pm$ 0.05                | n.d.            | n.d.            | n.d.                            | n.d.            | n.d.            | 4.88 $\pm$ 0.18                     | 2.84 $\pm$ 0.10 | 0.86 $\pm$ 0.03 |
| Dihydroxyphenyl- $\gamma$ -valerolactone sulphate              | 9.42 $\pm$ 0.48                | 1.57 $\pm$ 0.08 | 19.0 $\pm$ 0.69 | 16.4 $\pm$ 0.59                 | 1.23 $\pm$ 0.09 | 18.0 $\pm$ 0.60 | 50.7 $\pm$ 2.60                     | 5.90 $\pm$ 0.30 | 24.1 $\pm$ 1.24 |
| Dihydroxyphenyl- $\gamma$ -valerolactone glucuronide           | n.d.                           | 0.38 $\pm$ 0.02 | 4.84 $\pm$ 0.24 | 4.68 $\pm$ 0.24                 | 0.37 $\pm$ 0.03 | 3.68 $\pm$ 0.19 | 37.5 $\pm$ 2.21                     | 1.63 $\pm$ 0.10 | 6.91 $\pm$ 0.41 |
| Dihydroxyphenyl- $\gamma$ -valerolactone sulphate glucuronide  | 3.57 $\pm$ 0.21                | 0.36 $\pm$ 0.02 | 3.75 $\pm$ 0.21 | 2.89 $\pm$ 0.17                 | 0.25 $\pm$ 0.01 | 2.73 $\pm$ 0.16 | 4.53 $\pm$ 0.30                     | 0.99 $\pm$ 0.07 | 4.95 $\pm$ 0.22 |
| Dihydroxyphenylvaleric acid                                    | n.d.                           | n.d.            | n.d.            | n.d.                            | 1.35 $\pm$ 0.05 | n.d.            | n.d.                                | n.d.            | n.d.            |
| <i>Dihydrochalcones derivatives (<math>\mu</math>mols)</i>     |                                |                 |                 |                                 |                 |                 |                                     |                 |                 |

|                                                  |             |             |             |             |             |             |             |             |             |
|--------------------------------------------------|-------------|-------------|-------------|-------------|-------------|-------------|-------------|-------------|-------------|
| Phloretin sulphate                               | 0.15 ± 0.01 | 0.10 ± 0.01 | 0.08 ± 0.00 | 0.07 ± 0.00 | 0.02 ± 0.00 | 0.08 ± 0.00 | 0.18 ± 0.01 | 0.11 ± 0.01 | 0.09 ± 0.00 |
| Phloretin glucuronide                            | 0.24 ± 0.01 | 0.16 ± 0.01 | 0.12 ± 0.01 | 0.26 ± 0.01 | 0.12 ± 0.01 | 0.31 ± 0.02 | 0.38 ± 0.02 | 0.80 ± 0.06 | 0.27 ± 0.01 |
| Phloretin sulphate glucuronide                   | 0.16 ± 0.01 | 0.09 ± 0.00 | 0.10 ± 0.00 | 0.09 ± 0.01 | 0.01 ± 0.00 | 0.09 ± 0.01 | 0.12 ± 0.01 | 0.13 ± 0.01 | 0.06 ± 0.00 |
| <i>Phenylpropionic acids derivatives (μmols)</i> |             |             |             |             |             |             |             |             |             |
| Hydroxyphenylpropionic acid                      | 14.6 ± 0.52 | n.d.        | 0.19 ± 0.01 | 2.89 ± 0.11 | n.d.        | 8.27 ± 0.48 | 42.6 ± 1.55 | 1.40 ± 0.05 | 18.0 ± 0.65 |
| Hydroxyphenylpropionic acid sulphate             | 75.0 ± 2.38 | 3.14 ± 0.11 | 35.0 ± 1.80 | 27.0 ± 1.39 | 1.40 ± 0.05 | 110 ± 7.34  | 108 ± 5.52  | 28.8 ± 1.48 | 77.7 ± 3.99 |
| Hydroxyphenylpropionic acid glucuronide          | 3.62 ± 0.21 | n.d.        | 0.25 ± 0.01 | 1.05 ± 0.06 | n.d.        | 1.11 ± 0.08 | 1.49 ± 0.09 | 0.82 ± 0.05 | 2.09 ± 0.12 |
| Dihydroxyphenylpropionic acid                    | 0.38 ± 0.03 | 0.10 ± 0.00 | n.d.        | 2.27 ± 0.16 | n.d.        | 0.11 ± 0.00 | 4.68 ± 0.31 | 2.39 ± 0.16 | 0.95 ± 0.06 |
| Dihydroxyphenylpropionic acid sulphate           | 35.0 ± 2.59 | 13.0 ± 0.76 | 50.9 ± 3.16 | 266 ± 14.5  | 3.27 ± 0.17 | 72.5 ± 2.58 | 119 ± 8.87  | 85.3 ± 6.35 | 183 ± 13.6  |
| Dihydrocaffeic acid glucuronide                  | n.d.        | 0.21 ± 0.01 | 0.44 ± 0.03 | 0.24 ± 0.01 | n.d.        | n.d.        | 0.22 ± 0.01 | 0.76 ± 0.03 | 0.41 ± 0.02 |
| <i>Benzoic acids (μmols)</i>                     |             |             |             |             |             |             |             |             |             |
| Vanillic acid                                    | n.d.        | n.d.        | n.d.        | n.d.        | n.d.        | n.d.        | 3.13 ± 0.11 | 1.73 ± 0.06 | n.d.        |
| Vanillic acid sulphate                           | n.d.        | 2.34 ± 0.08 | 1.76 ± 0.06 | 28.6 ± 1.06 | n.d.        | 5.36 ± 0.20 | 61.9 ± 3.17 | 57.2 ± 2.93 | 19.4 ± 0.70 |
| Vanillic acid glucuronide                        | n.d.        | 0.22 ± 0.01 | 0.39 ± 0.02 | 0.08 ± 0.00 | 0.12 ± 0.01 | 0.20 ± 0.01 | 6.67 ± 0.39 | 4.32 ± 0.25 | 3.08 ± 0.16 |
| Homovanillic acid                                | n.d.        |
| Homovanillic ac sulphate                         | 20.5 ± 0.75 | n.d.        | n.d.        | 32.4 ± 1.94 | n.d.        | 1.01 ± 0.06 | 21.8 ± 1.45 | 7.22 ± 0.48 | n.d.        |
| Protocatechuic acid                              | n.d.        |
| Protocatechuic acid sulphate                     | 2.43 ± 0.13 | 0.45 ± 0.02 | 4.52 ± 0.27 | 4.67 ± 0.30 | 0.31 ± 0.01 | 1.76 ± 0.12 | 19.1 ± 1.42 | 13.8 ± 1.03 | 14.0 ± 0.82 |
| Protocatechuic acid glucuronide                  | n.d.        | 0.01 ± 0.00 | n.d.        | 0.09 ± 0.01 | n.d.        | 0.01 ± 0.00 | 0.70 ± 0.03 | 0.04 ± 0.00 | 0.21 ± 0.01 |
| Hydroxytyrosol sulphate                          | 5.76 ± 0.30 | n.d.        | n.d.        | 7.90 ± 0.35 | n.d.        | n.d.        | 20.2 ± 0.73 | 0.66 ± 0.02 | n.d.        |
| Hydroxytyrosol glucuronide                       | 0.07 ± 0.00 | 0.10 ± 0.01 | 0.09 ± 0.01 | n.d.        | 0.03 ± 0.00 | 0.03 ± 0.00 | 0.11 ± 0.01 | 0.20 ± 0.01 | 0.09 ± 0.01 |
| <i>p</i> -hydroxybenzoic acid                    | 0.03 ± 0.00 | 0.28 ± 0.01 | n.d.        | 0.27 ± 0.01 | n.d.        | 0.46 ± 0.02 | 4.19 ± 0.25 | 2.30 ± 0.14 | 1.01 ± 0.04 |
| Hydroxybenzoic acid sulphate                     | 29.3 ± 1.11 | 3.47 ± 0.13 | 0.09 ± 0.01 | 18.2 ± 0.93 | n.d.        | 1.81 ± 0.09 | 64.1 ± 4.27 | 5.08 ± 0.34 | 2.72 ± 0.10 |
| Hydroxybenzoic acid glucuronide                  | 0.64 ± 0.02 | 0.00 ± 0.00 | 0.05 ± 0.00 | 0.78 ± 0.05 | n.d.        | 0.02 ± 0.00 | 0.86 ± 0.06 | 0.05 ± 0.00 | 0.18 ± 0.01 |
| Hydroxyhippuric acid                             | 3.85 ± 0.20 | 1.58 ± 0.14 | n.d.        | 11.9 ± 0.79 | 0.72 ± 0.04 | 7.81 ± 0.52 | 33.6 ± 1.48 | 14.6 ± 0.64 | 16.4 ± 0.96 |
| <i>Hydroxycinnamic acids derivatives (μmols)</i> |             |             |             |             |             |             |             |             |             |
| Coumaric acid                                    | 0.43 ± 0.02 | 0.15 ± 0.01 | 0.18 ± 0.01 | 0.20 ± 0.01 | 0.11 ± 0.00 | 0.12 ± 0.00 | 1.42 ± 0.05 | 0.52 ± 0.02 | 0.24 ± 0.01 |
| Coumaric acid sulphate                           | 2.65 ± 0.13 | n.d.        | n.d.        | 0.89 ± 0.05 | 0.02 ± 0.00 | 0.62 ± 0.03 | 25.1 ± 1.29 | 1.02 ± 0.05 | 1.16 ± 0.06 |
| Caffeic acid sulphate                            | 0.27 ± 0.01 | 0.34 ± 0.02 | 0.59 ± 0.03 | 1.10 ± 0.06 | 0.22 ± 0.01 | 0.84 ± 0.05 | 1.44 ± 0.08 | 0.94 ± 0.05 | 0.73 ± 0.04 |
| Caffeic acid glucuronide                         | 0.04 ± 0.00 | n.d.        | n.d.        | 0.02 ± 0.00 | n.d.        | n.d.        | n.d.        | n.d.        | n.d.        |
| Ferulic acid                                     | 0.00 ± 0.00 | 0.01 ± 0.00 | n.d.        | 0.11 ± 0.01 | 0.05 ± 0.00 | 0.02 ± 0.00 | 0.25 ± 0.02 | 0.14 ± 0.01 | 0.18 ± 0.01 |
| Ferulic acid sulphate                            | 0.80 ± 0.03 | 0.93 ± 0.07 | 1.54 ± 0.10 | 3.51 ± 0.15 | 0.07 ± 0.00 | 2.38 ± 0.18 | 2.78 ± 0.21 | 3.79 ± 0.28 | 1.21 ± 0.09 |
| Ferulic acid glucuronide                         | 0.15 ± 0.01 | 0.05 ± 0.00 | 0.13 ± 0.01 | 0.36 ± 0.01 | 0.03 ± 0.00 | 0.13 ± 0.00 | 0.29 ± 0.01 | 0.14 ± 0.01 | 0.16 ± 0.01 |
| Dihydroferulic acid                              | 0.02 ± 0.00 | n.d.        | n.d.        | 0.52 ± 0.03 | n.d.        | n.d.        | 2.22 ± 0.08 | 0.44 ± 0.02 | 2.69 ± 0.10 |
| Dihydroferulic acid sulphate                     | n.d.        | 0.05 ± 0.00 | n.d.        | 3.61 ± 0.21 | n.d.        | 0.18 ± 0.00 | 2.79 ± 0.14 | 1.55 ± 0.08 | 1.15 ± 0.06 |
| Dihydroferulic acid glucuronide                  | 0.08 ± 0.00 | 0.01 ± 0.00 | n.d.        | 0.93 ± 0.07 | n.d.        | 0.11 ± 0.01 | 0.83 ± 0.05 | 0.29 ± 0.02 | 0.41 ± 0.02 |
